# Supplementary material for: Highly efficient TiO 2 –graphene nanocomposite for methylene blue decomposition under visible-light irradiation
Source: Research Square preprint supplement (doi:10.21203/rs.3.rs-6944176/v1), 2025-07-24
Supplement: Supplementary file 1 [file abb18c639dc2b46b042cffb8.docx]

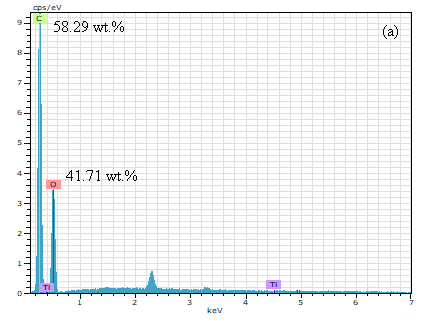


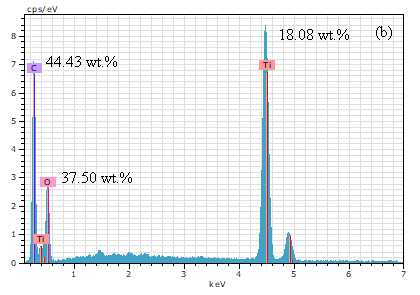


Fig. S1. EDX spectra of (a) GO and (b) TGP-50 samples.


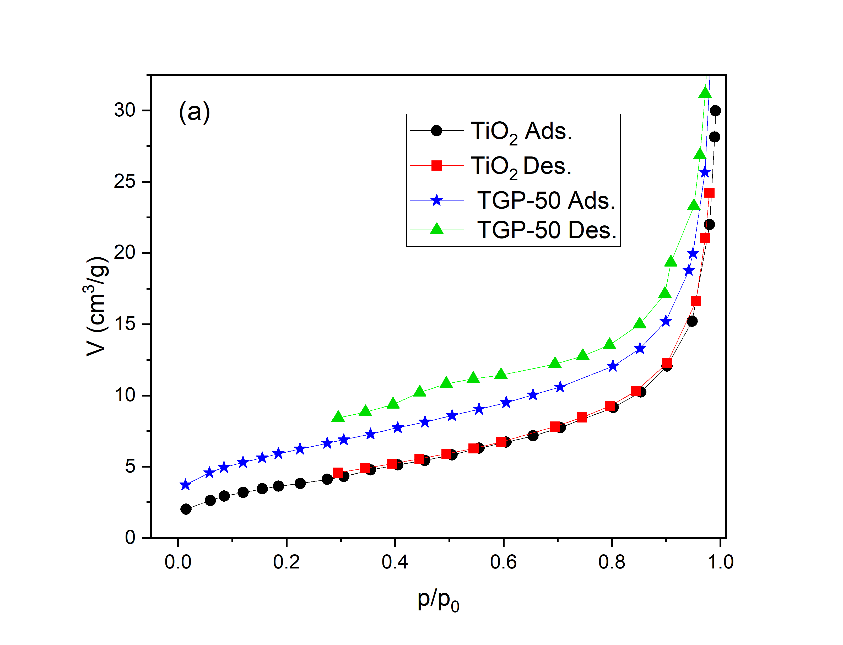

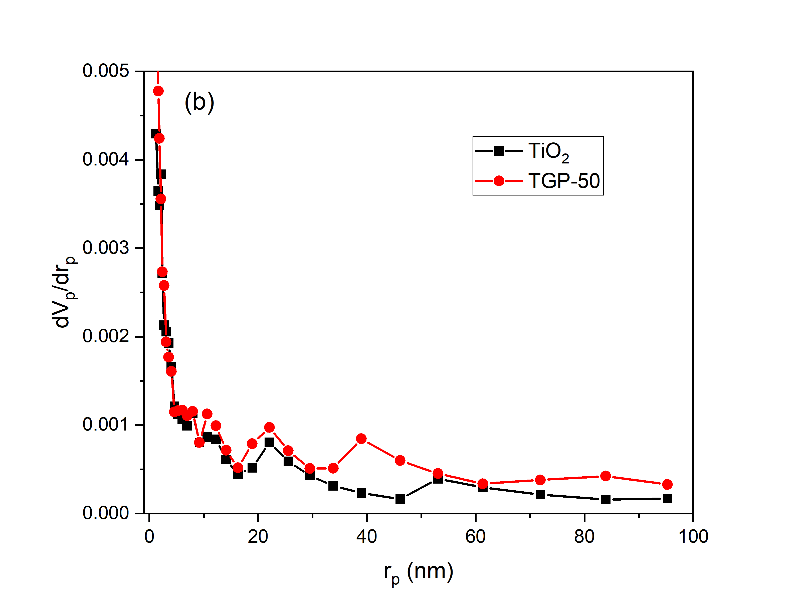


Fig. S2. (a) The nitrogen adsorption-desorption isotherm and (b) Pore size distribution of bare TiO2 and TGP-50 samples.
